# Supplementary material for: Estimating COVID-19-Related Infections, Deaths, and Hospitalizations in Iran Under Different Physical Distancing and Isolation Scenarios
Source: PubMed Central journal article supplement (PMC9278464; doi:10.34172/ijhpm.2020.134), 2020-08-01
Supplement: ijhpm-11-334-s002.pdf [file ijhpm-11-334-s002.pdf]

## Supplementary file 2

**Table S1.** Disease and demographic inputs and parameters used in the SEIR model

| Parameters                        | Definition                                                                               | Values                                                                                                                        | References     |
|-----------------------------------|------------------------------------------------------------------------------------------|-------------------------------------------------------------------------------------------------------------------------------|----------------|
| Susceptible<br>S(t)               | Susceptible individuals to getting the infection at any time                             | At time 0 (start of the epidemic, January 21)<br>n = 10 million for Tehran (capital)<br>n = 83 million for the national model | <sup>1,2</sup> |
| Exposed<br>E(t)                   | Exposed individuals to the virus at any time                                             | At time 0 (start of the epidemic, January 21)<br>n = 70 in Tehran<br>n = 1170 in the national model                           | --             |
| Infected<br>I(t)                  | Infected individuals at any time                                                         | At time 0<br>n = 5 in Tehran<br>n = 90 in the national model                                                                  | --             |
| Isolated<br>Is(t)                 | Individuals who become home-isolated after getting the infection without hospitalization | At time 0<br>Value = 0                                                                                                        | --             |
| Recovered<br>R(t)                 | Individuals who are recovered from the infection                                         | At time 0<br>Value = 0                                                                                                        | --             |
| Hospital<br>H(t)                  | Individuals who are hospitalized                                                         | At time 0<br>Value = 0                                                                                                        | --             |
| Death<br>D(t)                     | Individuals who died of the infection                                                    | At time 0<br>Value = 0                                                                                                        | --             |
| Temporary Isolation Units<br>T(t) | TIU individuals who are discharged from hospitals                                        | At time 0<br>Value = 0                                                                                                        | --             |
| N                                 | Country total population                                                                 | N = 10 million for Tehran (capital)<br>N = 83 million for the national model                                                  | <sup>1,2</sup> |
| C                                 | The average number of contacts for each uninfected individual                            | The values of these parameters are                                                                                            | --             |

| Parameters | Definition                                                                                                                            | Values                                                                                                                                                                                 | References     |
|------------|---------------------------------------------------------------------------------------------------------------------------------------|----------------------------------------------------------------------------------------------------------------------------------------------------------------------------------------|----------------|
|            |                                                                                                                                       | reported in Appendix B Table 2.                                                                                                                                                        |                |
| B (Beta)   | Transmission probability (the probability of getting the infection when an infected individual contact with an uninfected individual) | Ranged from 0.0423 in 21 January to 0.025813 in 19 June<br>Seasonality distribution: $((\sin(2 \times 3.14 \times (\text{Time} + 110) / 365)) + 1) \times ((0.045 - 0.02) / 2) + 0.02$ | <sup>3-5</sup> |
| II(t)      | Infected individuals with the potential to infect uninfected people                                                                   | $I + (0.1 \times T) + (0.02 \times H)$                                                                                                                                                 | --             |
| SE         | The average number of people from susceptible individuals are added to exposed individuals (per day)                                  | $B \times C \times (II/N) \times S$                                                                                                                                                    | --             |
| EI         | The average number of people from exposed individuals are added to infected individuals (per day)                                     | $E \times (1/D1)$                                                                                                                                                                      | --             |
| D1         | The average duration taken for an exposed individual becomes an infected individual                                                   | Normal (5.33, 0.445) <sup>a</sup>                                                                                                                                                      | <sup>6</sup>   |
| I.Is       | The number of people who become home-isolated (per day)                                                                               | $(I) \times (I.Is.R) \times (1/D6)$                                                                                                                                                    | --             |
| D6         | The average duration taken for an infected individual becomes home-isolated                                                           | Normal (3, 0.5) <sup>a</sup>                                                                                                                                                           | Expert Opinion |
| I.Is.R     | % of infected individuals becomes isolated                                                                                            | According to the possible scenarios in the text                                                                                                                                        | --             |
| IsR        | The number of people who become recovered after isolation (per day)                                                                   | $(Is)/D7$                                                                                                                                                                              | --             |
| D7         | The duration taken for an isolated individual becomes recovered                                                                       | Normal (7.91, 0.5) <sup>a</sup>                                                                                                                                                        | <sup>6</sup>   |
| I.R        | The total number of infected cases who become recovered (without isolation and without hospitalization)                               | $(I) \times (I.R.R) \times (1/D8)$                                                                                                                                                     | --             |

| Parameters | Definition                                                                                                        | Values                              | References                       |
|------------|-------------------------------------------------------------------------------------------------------------------|-------------------------------------|----------------------------------|
| I.R.R      | % of infected cases who become recovered (without isolation and without hospitalization)                          | According to the possible scenarios | --                               |
| D8         | The average duration taken for an infected case becomes recovered (without isolation and without hospitalization) | Normal (10.91, 0.50) <sup>a</sup>   | <sup>6</sup>                     |
| IH         | Number of infected individuals who are hospitalized (per day)                                                     | $I \times (1/D2) \times (IH.R)$     | --                               |
| IH.R       | % of infected individuals who are hospitalized                                                                    | Normal (0.05, 0.01) <sup>a</sup>    | National Data and Expert Opinion |
| D2         | The average duration taken for an infected individual stays in hospital                                           | Normal (2, 0.5) <sup>a</sup>        | Expert Opinion                   |
| HT         | Number of hospitalized cases who are discharged from hospital (per day)                                           | $(HT.R) \times (H) \times (1/D4)$   | --                               |
| HT.R       | % of hospitalized cases who discharged from hospital                                                              | Normal (0.9, 0.01) <sup>a</sup>     | National Data and Expert Opinion |
| D4         | The average duration taken for a hospitalized individual to be discharged                                         | Normal (5, 0.5) <sup>a</sup>        | National Data and Expert Opinion |
| TR         | Number of individuals who are on recovery after discharge                                                         | $(T) \times (TR.R) \times (1/D5)$   | --                               |
| TR.R       | % of infected cases who recovered after discharge                                                                 | $N(0.995, 0.001)$ <sup>a</sup>      | National Data and Expert Opinion |
| D5         | The average duration taken to be recovered after discharge                                                        | Normal (7, 0.5) <sup>a</sup>        | National Data and Expert Opinion |
| HD         | Number of hospitalized, infected cases who die in hospital (per day)                                              | $(H) \times (1/D3) \times (HD.R)$   | --                               |
| HD.R       | % of hospitalized, infected cases who die in hospital                                                             | $1 - HT.R$                          | --                               |
| D3         | The average duration taken for a hospitalized, infected case to die in hospital                                   | Normal (5, 0.5) <sup>a</sup>        | Expert Opinion                   |

| Parameters | Definition                                                                                                   | Values                                                          | References                               |
|------------|--------------------------------------------------------------------------------------------------------------|-----------------------------------------------------------------|------------------------------------------|
| ID         | Number of infected cases who die from the infection without being hospitalized                               | $(I) \times (ID.R) \times (1/D9)$                               | --                                       |
| ID.R       | % of infected cases who die from the infection without being hospitalized                                    | scenario A,B and C: 0.005<br>scenario D: 0.002<br>scenario E: 0 | Expert Opinion                           |
| D9         | The average duration taken to be died from the infection for infected individuals without being hospitalized | Normal (11, 0.50) <sup>a</sup>                                  | <sup>7</sup> justify with expert opinion |
| TD         | Number of infected cases who die after discharge (per day)                                                   | $(T) \times (TD.R) \times (1/D10)$                              | --                                       |
| TD.R       | % of infected cases who die from the infection after discharge (ie, 5 deaths in 1000 discharged cases)       | N(0.005, 0.001) <sup>a</sup>                                    | National Data<br>Expert Opinion          |
| D10        | The average duration taken to be died after discharge                                                        | Normal (7, 0.50) <sup>a</sup>                                   | Expert Opinion                           |

<sup>a</sup> Normal refers to the normal distribution (mean, SD)

**Table S2.** The values considered for effective contact rate (ie, C) within four months of the COVID-19 epidemic stratified by Tehran and national models

| Months and 10-day intervals        | Contact rate (C) |                | Reference |
|------------------------------------|------------------|----------------|-----------|
|                                    | Tehran model     | National model |           |
| From Jan 21, 2020, to Jan 30, 2020 | 14               | 13             | 7-11      |
| From Jan 31, 2002, to Feb 9, 2020  | 13               | 12             |           |
| From Feb 10, 2020, to Feb 19, 2020 | 12               | 11             |           |
| From Feb 20, 2020, to Feb 29, 2020 | 10               | 9              |           |
| From Mar 1, 2020, to Mar 20, 2020  | 5                | 5              |           |
| From Mar 21, 2020, to Mar 31, 2020 | 6*               | 6*             |           |
| From Apr 1, 2020, to June 19, 2020 | 5                | 5              |           |

\* Contact rates were assumed to increase due to the Nowruz holidays within these periods

## References

1. Iran population. <https://knoema.com/atlas/Iran/Population>. Accessed April 10, 2020.
2. Statistical Centre of Iran. *Selected Findings of the 2016 National Population and Housing Census*; 2018.

[https://www.amar.org.ir/Portals/1/census/2016/Census\\_2016\\_Selected\\_Findings.pdf](https://www.amar.org.ir/Portals/1/census/2016/Census_2016_Selected_Findings.pdf).

Accessed April 11, 2020.

3. Wan H, Cui J, Yang G-J. Risk estimation and prediction by modeling the transmission of the novel coronavirus (COVID-19) in mainland China excluding Hubei province. *medRxiv*. 2020.
4. Burke RM, Midgley CM, Dratch A, et al. Active Monitoring of Persons Exposed to Patients with Confirmed COVID-19 - United States, January-February 2020. *MMWR Morb Mortal Wkly Rep*. 2020;69(9):245-246. doi:[10.15585/mmwr.mm6909e1](https://doi.org/10.15585/mmwr.mm6909e1)
5. Haghdoost AA, Gooya MM, Baneshi MR. Modelling of H1N1 flu in Iran. 2009.
6. You C, Deng Y, Hu W, et al. Estimation of the time-varying reproduction number of COVID-19 outbreak in China. *Available SSRN 3539694*. 2020.
7. Mossong J, Hens N, Jit M, et al. Social contacts and mixing patterns relevant to the spread of infectious diseases. *PLoS Med*. 2008;5(3):0381-0391. doi:[10.1371/journal.pmed.0050074](https://doi.org/10.1371/journal.pmed.0050074)
8. Ibuka Y, Ohkusa Y, Sugawara T, et al. Social contacts, vaccination decisions and influenza in Japan. *J Epidemiol Community Heal*. 2016;70(2):162-167. doi:[10.1136/jech-2015-205777](https://doi.org/10.1136/jech-2015-205777)
9. Tang B, Bragazzi NL, Li Q, Tang S, Xiao Y, Wu J. An updated estimation of the risk of transmission of the novel coronavirus (2019-nCov). *Infect Dis Model*. 2020;5:248-255. doi:[10.1016/j.idm.2020.02.001](https://doi.org/10.1016/j.idm.2020.02.001)
10. Arregui S, Aleta A, Sanz J, Moreno Y. Projecting social contact matrices to different demographic structures. *PLoS Comput Biol*. 2018;14(12):e1006638. doi:[10.1371/journal.pcbi.1006638](https://doi.org/10.1371/journal.pcbi.1006638)
11. Hoang T, Coletti P, Melegaro A, et al. A systematic review of social contact surveys to inform transmission models of close-contact infections. *Epidemiology*. 2019;30(5):723-736.
