# Supplementary material for: Estimating COVID-19-Related Infections, Deaths, and Hospitalizations in Iran Under Different Physical Distancing and Isolation Scenarios
Source: PubMed Central journal article supplement (PMC9278464; doi:10.34172/ijhpm.2020.134), 2020-08-01
Supplement: ijhpm-11-334-s003.pdf [file ijhpm-11-334-s003.pdf]

**Supplementary file 3.** Calculation of Reproduction Number ( $R_0$ )

We calculated the reproduction number using this formula<sup>1</sup>:

Eq 9:

$$\begin{aligned}\frac{ds(t)}{dt} &= -\beta(t)C(t)\frac{II(t)}{N}S(t) \\ \frac{dE(t)}{dt} &= \beta(t)C(t)\frac{II(t)}{N}S(t) - \frac{1}{D1}E(t) \\ \frac{dI(t)}{dt} &= \frac{1}{D1}E(t) - \left(\frac{I.Is.R}{D6} + \frac{I.R.R}{D8} + \frac{IH.R}{D2} + \frac{ID.R}{D9}\right)I(t) \\ \frac{dR(t)}{dt} &= \frac{TR.R}{D5}T(t) + \frac{I.R.R}{D8}I(t) + \frac{1}{D7}Is(t) \\ \frac{dIs(t)}{dt} &= \frac{I.Is.R}{D6}I(t) - \frac{1}{D7}Is(t) \\ \frac{dH(t)}{dt} &= \frac{IH.R}{D2}I(t) - \left(\frac{HD.R}{D3} + \frac{HT.R}{D4}\right)H(t) \\ \frac{dT(t)}{dt} &= \frac{HT.R}{D4}H(t) - \left(\frac{TR.R}{D5} + \frac{TD.R}{D10}\right)T(t) \\ \frac{dD(t)}{dt} &= \frac{HD.R}{D3}H(t) + \frac{ID.R}{D9}I(t) + \frac{TD.R}{D10}T(t)\end{aligned}$$

$$F(X) = \begin{pmatrix} \beta(t)C(t)\frac{II(t)}{N} \\ 0 \\ 0 \\ 0 \\ 0 \\ 0 \\ 0 \end{pmatrix} \quad V(X) = \begin{pmatrix} \frac{1}{D1}E(t) \\ -\frac{1}{D1}E(t) + \left(\frac{I.Is.R}{D6} + \frac{I.R.R}{D8} + \frac{IH.R}{D2} + \frac{ID.R}{D9}\right)I(t) \\ -\frac{TR.R}{D5}T(t) - \frac{I.R.R}{D8}I(t) - \frac{1}{D7} \\ -\frac{I.Is.R}{D6}I(t) + \frac{1}{D7}Is(t) \\ -\frac{IH.R}{D2}I(t) + \left(\frac{HD.R}{D3} + \frac{HT.R}{D4}\right)H(t) \\ -\frac{HT.R}{D4}H(t) + \left(\frac{TR.R}{D5} + \frac{TD.R}{D10}\right)T(t) \\ -\frac{HD.R}{D3}H(t) - \frac{ID.R}{D9}I(t) - \frac{TD.R}{D10}T(t) \end{pmatrix}$$

The Jacobian matrices of  $F(X)$  and  $V(X)$  at the disease-free equilibrium  $X_0$  respectively,

$$\begin{aligned}\text{DFE } F(X) &= \begin{pmatrix} F & 0 \\ 0 & 0 \end{pmatrix} \\ \text{DFE } V(X) &= \begin{pmatrix} V & 0 \\ J_1 & J_2 \end{pmatrix}\end{aligned}$$

Then,

$$F = \begin{pmatrix} 0 & \beta(t) * C(t) \\ 0 & 0 \end{pmatrix}$$

$$V = \begin{pmatrix} \frac{1}{D1} & 0 \\ -\frac{1}{D1} & \left( \frac{I.Is.R}{D6} + \frac{I.R.R}{D8} + \frac{IH.R}{D2} + \frac{ID.R}{D9} \right) \end{pmatrix}$$

We calculated  $V^{-1}$  and  $FV^{-1}$  and  $R_0$

$$V^{-1} = \frac{1}{\frac{1}{D1} * \left( \frac{I.Is.R}{D6} + \frac{I.R.R}{D8} + \frac{IH.R}{D2} + \frac{ID.R}{D9} \right)} \begin{pmatrix} \left( \frac{I.Is.R}{D6} + \frac{I.R.R}{D8} + \frac{IH.R}{D2} + \frac{ID.R}{D9} \right) & 0 \\ \frac{1}{D1} & \frac{1}{D1} \end{pmatrix}$$

$$FV^{-1} = \begin{pmatrix} \frac{\beta(t) * C(t)}{\left( \frac{I.Is.R}{D6} + \frac{I.R.R}{D8} + \frac{IH.R}{D2} + \frac{ID.R}{D9} \right)} & \frac{\beta(t) * C(t)}{\left( \frac{I.Is.R}{D6} + \frac{I.R.R}{D8} + \frac{IH.R}{D2} + \frac{ID.R}{D9} \right)} \\ 0 & 0 \end{pmatrix}$$

$$\rho(FV^{-1}) = \frac{\beta(t) * C(t)}{\left( \frac{I.Is.R}{D6} + \frac{I.R.R}{D8} + \frac{IH.R}{D2} + \frac{ID.R}{D9} \right)}$$

$$R_e = \frac{\beta(t) * C(t)}{\left( \frac{I.Is.R}{D6} + \frac{I.R.R}{D8} + \frac{IH.R}{D2} + \frac{ID.R}{D9} \right)}$$

## References

1. Van den Driessche P, Watmough J. Reproduction numbers and sub-threshold endemic equilibria for compartmental models of disease transmission. *Math Biosci.* 2002;180(1-2):29-48. doi: [10.1016/S0025-5564\(02\)00108-6](https://doi.org/10.1016/S0025-5564(02)00108-6)
